## Effects of Electric and Magnetic Fields from High-power Lines on Female Urinary Excretion of 6-Sulfatoxymelatonin

Patrick Levallois,<sup>1,2</sup> Marie Dumont,<sup>3</sup> Yvan Touitou,<sup>4</sup> Suzanne Gingras,<sup>1</sup> Benoît Mâsse,<sup>5</sup> Denis Gauvin,<sup>1</sup> Edeltraut Kröger,<sup>1</sup> Michel Bourdages,<sup>6</sup> and Pierre Douville<sup>7</sup>

In 1998, the authors studied the effect of residential exposure to electric and magnetic fields from high-power lines on female urinary excretion of 6-sulfatoxymelatonin (6-OHMS) in the Quebec city, Canada, metropolitan area. A sample of 221 women living near a 735-kV line was compared with 195 women the same age living away from any power lines. Participants provided morning urine samples on 2 consecutive days and wore a magnetic dosimeter for 36 consecutive hours to measure personal magnetic exposure. The indoor electric field was assessed by spot measurements. After adjustment for other factors associated with low melatonin secretion, such as medication use or light exposure, nighttime concentration of 6-OHMS was similar in the two groups. When either 24-hour or sleep-time exposure to magnetic field or electric field measurements was used, no exposure-effect relation was evident. However, the trend of decreasing 6-OHMS concentration with age was more pronounced for women living near the lines, as was a lower 6-OHMS concentration in women with high body mass index. Chronic residential exposure to magnetic fields from high-power lines may accentuate the decrease in melatonin secretion observed in some vulnerable subgroups of the population. *Am J Epidemiol* 2001;154:601–9.

age factors; body mass index; electromagnetic fields; melatonin; urinalysis

The effects of chronic exposure to environmental electric and magnetic fields (EMF) have been the subject of intensive research leading to no definitive answers (1). Possible risks for childhood and adult leukemia have been acknowledged (1, 2), but many other health outcomes are still under study. Among them are breast cancer (3, 4), neuropsychological disorders (5, 6), and reproductive outcomes (7). An underlying mechanism that could explain all of these potential effects is alteration of melatonin secretion as a result of EMF exposure (8). Melatonin secretion is important in the

regulation of circadian rhythms and sleep (9) but could also be involved in the aging process (10), carcinogenesis (11), and reproduction (12).

A decrease in nocturnal melatonin secretion in rodents chronically exposed to EMF has frequently been reported (1, 4). Experiments on humans acutely exposed to EMF for one night have not resulted in reproducible effects on serum melatonin or urinary excretion of its main metabolite, 6-sulfatoxymelatonin (6-OHMS) (1, 4, 13–15). However, recent epidemiologic studies have suggested an effect of chronic EMF exposure on melatonin secretion. Reduced morning excretion of 6-OHMS has been reported in electrical train workers in Switzerland exposed to 20- $\mu$ T magnetic fields (16) and in US electric utility workers exposed to levels of 0.2  $\mu$ T with low variability (17). To our knowledge, only one study has evaluated the effect of chronic residential exposure to magnetic fields; it was carried out in Seattle, Washington, among women exposed to mean levels of 0.1  $\mu$ T (18). This study found an effect of nocturnal magnetic field exposure on morning 6-OHMS excretion among women using beta blockers and other related drugs, leading to the hypothesis of a particular vulnerability among these persons.

In a previous study, several of the authors (P. L., D. G. and S. G.) reported that people living near high-voltage power lines are particularly exposed to power-frequency EMF (19). In this paper, we present the results of an epidemiologic study in which we tested the hypothesis that chronic exposure to 60-Hz EMF emanating from power lines is associated with reduced 6-OHMS urinary excretion in

Received for publication November 27, 2000, and accepted for publication July 11, 2001.

Abbreviations: BMI, body mass index; EMF, electric and magnetic fields; 6-OHMS, 6-sulfatoxymelatonin.

<sup>1</sup>Unité de recherche en santé publique, Pavillon CHUL, Centre hospitalier universitaire de Québec, Québec, Canada.

<sup>2</sup>Institut national de santé publique du Québec and Université Laval, Québec, Canada.

<sup>3</sup>Chronobiology Laboratory, Hôpital du Sacré-Cœur and Université de Montréal, Québec, Canada.

<sup>4</sup>Service de Biochimie, Faculté de médecine Pitié-Salpêtrière, Paris, France.

<sup>5</sup>Groupe de recherche en épidémiologie, Hôpital du Saint-Sacrement, Centre hospitalier affilié universitaire de Québec, Québec, Canada.

<sup>6</sup>Institut de recherche d'Hydro-Québec, Varennes, Québec, Canada.

<sup>7</sup>Service de Biochimie, Hôpital de l'Hôtel-Dieu de Québec, Québec, Canada.

Reprint requests to Dr. Patrick Levallois, Unité de recherche en santé publique, Pavillon CHUL, Centre hospitalier universitaire de Québec, 2400, rue d'Estimauville, Beauport (Québec) Canada G1E 7G9 (e-mail: patrick.levallois@msh.ulaval.ca).

women aged 20–74 years. In addition, we evaluated whether some characteristics of participants known to reduce melatonin secretion, such as age and medication use, could modify the effect of exposure to magnetic fields.

## MATERIALS AND METHODS

Single-family or semidetached houses located within 150 m of a 735-kV power line and houses with similar characteristics in the same boroughs but located 400 m or more from any power line were identified in the Quebec city metropolitan area of Canada. Participants had to be female, aged 20–74 years, and living in the residence for at least the last year. The following criteria were used to exclude subjects for whom results could be difficult to interpret: subjects who worked at night, subjects who had traveled outside the province of Quebec in the last week, and subjects who slept on a heated water bed.

On the basis of results from a previous study (18), a sample size of 200 per group was required to obtain a power of 80 percent to be able to detect a 20 percent decrease in 6-OHMS excretion among subjects living near the lines. Participants were recruited by systematically sampling one residence out of two in each of the selected areas from February to December 1998. Residents of 1,834 houses were solicited: 733 near the lines and 1,101 far from the lines. Of the 417 eligible women living near the lines, 226 (54 percent) agreed to participate. Of the 516 eligible women living far from the lines, 198 (38 percent) accepted and participated in the study.

Trained technicians visited each participant's house twice, with about a 36-hour interval between visits. Visits alternated between subjects living near and far from the lines. Participants completed a questionnaire on their personal habits and health, including lifestyle and medication use on the days they participated in the study. Personal exposure to magnetic fields was assessed by means of an Emdex Lite meter (Eneritech Consultants Ltd., Campbell, California) that participants wore at the waist or in a pocket during their daily activities and kept under the bed at night. This meter took broadband measurements in the 40–1,000-Hz frequency range, and the sampling interval was adjusted to 30 seconds. Subjects also filled out a log sheet of their main activities during the whole participation period. Information on sleep periods and the 24-hour period before the last urine sample were then collated from the log sheet, and the arithmetic mean of the magnetic fields was calculated for each subject.

During each of the two visits, the technicians evaluated the indoor electric field in the daytime, between 7:30 a.m. and 8:30 p.m., by using a Holaday HI-3604 ELF/power frequency survey meter (Holaday Industries, Inc., Eden Prairie, Minnesota), which measures the vertical component of the electric field in the 50–1,000-Hz range. To avoid distortion of the field, one measure was taken in the center of the kitchen, living room, and bedroom, away from any structure or person. The mean of the six instantaneous measures was considered a proxy for electric field exposure in the home. Light exposure at night was evaluated by means of a Luxmeter EXTECH model 401020 (Extech Instruments Corporation,

Waltham, Massachusetts). This meter evaluates light intensity from 0 to 2,000 lux, and measurements were recorded every minute with a data logger EXTECH model 383274 (Extech Instruments Corporation). Since urine collection covered the interval between bedtime and awakening, light exposure was measured in the bedroom only, during the sleep episode. In their diary, subjects had to specify whether they turned the lights on during the night and, if so, for how long. All apparatus used to measure EMF and light exposure were calibrated regularly during the study.

First-morning urine was collected after each of the 2 consecutive nights. Each subject was requested to empty her bladder just before going to bed and to collect all urine excreted until she got up for the morning. The entire urine volume collected was kept in the refrigerator in special containers (one for each day). Each day's urine volume was measured, and two 2.5-ml samples were frozen for analysis. The concentration of 6-OHMS was assessed by using a direct radioimmunoassay kit (CIDTech Research Inc., Mississauga, Ontario, Canada), as described by Arendt et al. (20). The intraassay coefficients of variation were 20, 14, 10, and 12 percent for four control samples of 1.0, 4.3, 7.0, and 11.0 ng of 6-OHMS/ml, respectively. The interassay coefficients of variation for these control samples were 9, 10, 5, and 7 percent, respectively. The 6-OHMS results were adjusted for creatinine.

Of the 424 participants, 8 were excluded from statistical analysis because of inadequate urine sampling. We compared EMF exposures and characteristics for participants living near and away from power lines. Measures of exposure were the individual arithmetic means of magnetic field measurements during the two sleep episodes and during the 24-hour period, the indoor electric field measurement, and the variability of the magnetic fields, which was assessed by using the standardized rate of change metric (17). Proportions were compared by using Fisher's exact tests or chi-square tests, and means were compared with Student's *t* tests or analyses of variance. Correlations between the 2 days were assessed by using Pearson's correlation coefficient. The effect of different variables on 6-OHMS concentration was assessed with analyses of variance for repeated measures by using the MIXED procedure in Statistical Analysis System software (SAS Institute, Inc., Cary, North Carolina). Adjustment for potential confounding was performed by including in the model all variables associated with the 6-OHMS concentration ( $p \leq 0.15$ ). Modification of the effect was assessed for age, use of medication (beta blockers, calcium channel blockers, and anti-anxiety and nonsteroidal anti-inflammatory drugs), body mass index (BMI), standardized rate of change metric, and electric field. Considered statistically significant were *p* values of  $\leq 0.05$  (bilateral test).

The study protocol was approved by the ethics committee of Laval University Hospital (Quebec). All subjects gave signed, informed consent and obtained monetary compensation (25 Can \$ (approximately 16 US \$)).

## RESULTS

Mean age was similar in the two groups: 45.5 years (standard deviation, 11.2) in the group living near the lines and 45.8 years (standard deviation, 12.4) in the group living

away from the lines ( $p = 0.81$ ). Other general characteristics were mostly comparable (table 1). However, women living near the lines were less educated ( $p = 0.04$ ). Potential risk factors associated with melatonin secretion also were compared (results presented in table 2). Only daylight length during data collection was significantly different between the two groups ( $p = 0.04$ ); a slightly larger proportion of subjects living near power lines was studied in photoperiods shorter than 12 hours. Interestingly, time between evening and morning urination was similar in the two groups, as was bedtime ( $p = 0.52$ ; data not shown). Self-reported health status was comparable. In particular, the proportion of subjects having made at least one medical visit in the last year was similar (85 percent in the group near the lines and 79 percent in the control group,  $p = 0.16$ ), and reasons for consultation were distributed equally in the two groups (data not shown). No subject reported renal or hepatic disease.

Mean 24-hour magnetic field exposure was 2.5 times higher in the group living near the lines than in the control group (geometric mean, 0.33 vs. 0.13  $\mu\text{T}$ ;  $p < 0.001$ ).

Exposure during sleep was also very different between the two groups (geometric means of the individual mean of 2 nights of exposure, 0.29 vs. 0.08  $\mu\text{T}$ ;  $p < 0.001$ ), and mean measurements from the 2 nights were highly correlated ( $r = 0.98$ ,  $p < 0.001$ ; log-transformed data). Exposure to residential electric fields was nearly twice as high in the group living near the lines (geometric mean, 10.5 vs. 5.8 V/m;  $p < 0.001$ ).

Nocturnal excretion of 6-OHMS was highly correlated between the 2 days of measurement ( $r = 0.92$ ,  $p < 0.001$ ; log-transformed data). Association with 6-OHMS concentration was evaluated specifically for potential risk factors and for the only variable found to be associated with proximity to a power line: education. Age, menopausal status, BMI, alcohol consumption, medication use, and education were all associated with 6-OHMS urinary excretion (table 2). Results from the crude analysis (data not shown) and the adjusted analysis were the same, except for light exposure at night, which was associated with 6-OHMS in the crude analysis ( $p = 0.04$ ). Because menopausal status was strongly associated with age, it was removed from further analyses.

**TABLE 1. General characteristics of 221 women living near a 735-kV power line and of 195 women living far away from any lines, Quebec, Canada, 1998**

| Characteristic*                                         | Living near |    | Living far away |    | <i>p</i> value† |
|---------------------------------------------------------|-------------|----|-----------------|----|-----------------|
|                                                         | No.         | %  | No.             | %  |                 |
| Education                                               |             |    |                 |    |                 |
| ≤High school                                            | 115         | 52 | 80              | 41 | 0.04            |
| College/technical                                       | 61          | 28 | 59              | 30 |                 |
| University                                              | 44          | 20 | 56              | 29 |                 |
| Family size                                             |             |    |                 |    |                 |
| 1–2                                                     | 80          | 36 | 62              | 32 | 0.64            |
| 3–4                                                     | 102         | 46 | 96              | 49 |                 |
| ≥5                                                      | 39          | 18 | 37              | 19 |                 |
| Annual family income (Can \$‡)                          |             |    |                 |    |                 |
| <40,000                                                 | 62          | 34 | 41              | 25 | 0.10            |
| 40,000–59,999                                           | 65          | 36 | 62              | 37 |                 |
| ≥60,000                                                 | 54          | 30 | 64              | 38 |                 |
| Employed during the last year                           |             |    |                 |    |                 |
| Yes                                                     | 121         | 55 | 112             | 57 | 0.62            |
| No                                                      | 100         | 45 | 83              | 43 |                 |
| Smoker                                                  |             |    |                 |    |                 |
| Yes                                                     | 52          | 24 | 42              | 22 | 0.64            |
| No                                                      | 169         | 76 | 153             | 78 |                 |
| Time (no. of hours) away from home in the last 24 hours |             |    |                 |    |                 |
| <3                                                      | 47          | 22 | 41              | 21 | 0.97            |
| 3–8                                                     | 91          | 42 | 80              | 42 |                 |
| ≥9                                                      | 77          | 36 | 71              | 37 |                 |
| Duration of residence (years)                           |             |    |                 |    |                 |
| <10                                                     | 79          | 36 | 87              | 45 | 0.22            |
| 10–19                                                   | 59          | 27 | 46              | 24 |                 |
| ≥20                                                     | 79          | 36 | 61              | 31 |                 |

\* Variations in subject numbers are due to missing data for selected variables.

† Obtained by using the chi-square test or Fisher's exact test (for fourfold table).

‡ 1 Can \$ = approximately 0.64 US \$.

**TABLE 2. Study participants' mean creatinine-adjusted 6-sulfatoxymelatonin concentrations for selected variables, Quebec, Canada, 1998**

| Variable                                                   | No. | % living near a power line | Adjusted geometric mean*,† (ng/mg cr) | p value |
|------------------------------------------------------------|-----|----------------------------|---------------------------------------|---------|
| Age (years)                                                |     |                            |                                       |         |
| 20–39                                                      | 130 | 52                         | 19.87 (17.06, 23.13)                  | 0.01    |
| 40–59                                                      | 234 | 57                         | 16.30 (14.69, 18.09)                  |         |
| 60–74                                                      | 52  | 40                         | 14.33 (11.85, 17.31)                  |         |
| Education                                                  |     |                            |                                       |         |
| ≤High school                                               | 195 | 59                         | 14.75 (13.07, 16.64)                  | 0.02    |
| College/technical                                          | 120 | 51                         | 18.16 (15.76, 20.92)                  |         |
| University                                                 | 100 | 44                         | 17.32 (14.86, 20.20)                  |         |
| Postmenopausal‡                                            |     |                            |                                       |         |
| Yes                                                        | 155 | 54                         | 14.98 (13.39, 16.76)                  | <0.01   |
| No                                                         | 246 | 52                         | 19.15 (16.95, 21.64)                  |         |
| Body mass index (kg/m <sup>2</sup> )                       |     |                            |                                       |         |
| <27                                                        | 308 | 55                         | 19.08 (17.21, 21.15)                  | <0.01   |
| ≥27                                                        | 106 | 49                         | 14.58 (12.60, 16.88)                  |         |
| Alcohol consumption in the last 24 hours                   |     |                            |                                       |         |
| Yes                                                        | 115 | 51                         | 18.27 (15.80, 21.13)                  | 0.02    |
| No                                                         | 301 | 54                         | 15.22 (13.74, 16.85)                  |         |
| Caffeine consumption in the last 24 hours (mg)             |     |                            |                                       |         |
| <300                                                       | 301 | 53                         | 16.16 (13.39, 19.51)                  | 0.70    |
| ≥300                                                       | 115 | 54                         | 16.76 (15.10, 18.60)                  |         |
| Medication use§ in the last 24 hours                       |     |                            |                                       |         |
| Yes                                                        | 90  | 54                         | 14.85 (12.76, 17.29)                  | 0.01    |
| No                                                         | 326 | 53                         | 18.72 (16.87, 20.78)                  |         |
| Daylight length (no. of hours) during data collection      |     |                            |                                       |         |
| 8–9:59                                                     | 106 | 60                         | 15.96 (13.60, 18.72)                  | 0.92    |
| 10–11:59                                                   | 78  | 62                         | 16.70 (13.94, 20.01)                  |         |
| 12–13:59                                                   | 95  | 48                         | 16.93 (14.53, 19.73)                  |         |
| 14–15:59                                                   | 137 | 46                         | 16.83 (14.78, 19.16)                  |         |
| Bedroom nocturnal light exposure >50 lux                   |     |                            |                                       |         |
| Yes                                                        | 139 | 50                         | 17.16 (15.00, 19.62)                  | 0.96    |
| No                                                         | 243 | 54                         | 17.09 (15.22, 19.19)                  |         |
| Light use at night                                         |     |                            |                                       |         |
| Yes                                                        | 177 | 48                         | 15.83 (14.00, 17.91)                  | 0.12    |
| No                                                         | 239 | 57                         | 17.56 (15.61, 19.76)                  |         |
| Time (no. of hours) between evening and morning urinations |     |                            |                                       |         |
| <7                                                         | 27  | 67                         | 16.19 (12.50, 20.97)                  | 0.43    |
| 7–7:59                                                     | 114 | 52                         | 15.34 (13.24, 17.76)                  |         |
| 8–8:59                                                     | 171 | 54                         | 17.32 (15.19, 19.75)                  |         |
| ≥9                                                         | 104 | 49                         | 17.34 (14.98, 20.07)                  |         |

\* Geometric mean of creatinine-adjusted 6-sulfatoxymelatonin (6-OHMS) (ng/mg cr) urinary excretion adjusted by repeated analysis of variance for age, body mass index, alcohol consumption in the last 24 hours, medication use in the last 24 hours, light use at night, and education.

† 95% confidence interval in parentheses.

‡ Geometric mean of 6-OHMS (ng/mg cr) urinary excretion adjusted by repeated analysis of variance for body mass index, alcohol consumption in the last 24 hours, medication use in the last 24 hours, light use at night, and education.

§ Beta blockers, calcium channel blockers, and anti-anxiety and nonsteroidal anti-inflammatory drugs.

Nocturnal 6-OHMS urinary excretion was similar in the two groups (table 3). No significant trend was found between

6-OHMS concentration and quartiles of exposure to EMF. However, further analyses revealed that age and BMI were

significant modifiers of the effect of magnetic fields on 6-OHMS concentration. In particular, the decrease in 6-OHMS concentration with age and BMI was significantly more pronounced for those living near the lines than for the control group (table 4). Interaction was mainly present for age when exposure during the sleep period was considered and for BMI when the 24-hour exposure period was considered (table 5). No modification effect was found for medication use, standardized rate of change metric, or electric field exposure.

## DISCUSSION

High-power lines are among the strongest sources of residential exposure to power-frequency EMF (19, 21, 22). To

our knowledge, the present study is the first to evaluate the effect of such particularly high residential exposure to EMF. The type of exposure to EMF generated by those high-power lines is rather stable (19). Since one of our criteria for eligibility was living in the residence for at least a year, this study measured the effect of chronic exposure to EMF. Nocturnal urinary excretion of 6-OHMS was chosen as an index of melatonin secretion because it is well correlated with peak and mean nocturnal plasma melatonin concentration (23, 24). Because melatonin secretion has been reported to differ with gender (25, 26), only women were studied to reduce variability in the measures.

Mean urinary 6-OHMS concentration was almost identical for the group living close to high-power lines (735 kV)

**TABLE 3. Study participants' mean creatinine-adjusted 6-sulfatoxymelatonin concentrations for different measures of exposure to electric and magnetic fields, Quebec, Canada, 1998**

| Exposure                                                  | Crude concentration           |                    | Adjusted concentration*       |                    |                   |
|-----------------------------------------------------------|-------------------------------|--------------------|-------------------------------|--------------------|-------------------|
|                                                           | Geometric mean†<br>(ng/mg cr) | <i>p</i><br>value‡ | Geometric mean†<br>(ng/mg cr) | <i>p</i><br>value‡ | <i>p</i><br>trend |
| All participants                                          | 18.41 (17.20, 19.70)          |                    |                               |                    |                   |
| Group                                                     |                               |                    |                               |                    |                   |
| Living away from any power line                           | 18.38 (16.64, 20.29)          | 0.95               | 16.69 (14.84, 18.76)          | 0.99               |                   |
| Living near a 735-kV line                                 | 18.45 (16.81, 20.25)          |                    | 16.67 (14.74, 18.85)          |                    |                   |
| Personal magnetic field exposure during 24 hours          |                               |                    |                               |                    |                   |
| Quartile 1 (<0.13 μT)                                     | 20.19 (17.59, 23.17)          | 0.05               | 17.27 (14.80, 20.16)          | 0.29               | 0.22              |
| Quartile 2 (0.13–0.20 μT)                                 | 17.54 (15.30, 20.10)          |                    | 16.33 (14.12, 18.88)          |                    |                   |
| Quartile 3 (0.21–0.36 μT)                                 | 20.14 (17.56, 23.09)          |                    | 17.88 (15.25, 20.97)          |                    |                   |
| Quartile 4 (≥0.37 μT)                                     | 15.93 (13.88, 18.29)          |                    | 15.10 (12.98, 17.57)          |                    |                   |
| Personal magnetic field exposure during sleep             |                               |                    |                               |                    |                   |
| Quartile 1 (<0.07 μT)                                     | 18.69 (16.28, 21.45)          | 0.33               | 16.62 (14.35, 19.23)          | 0.59               | 0.30              |
| Quartile 2 (0.07–0.15 μT)                                 | 18.51 (16.12, 21.25)          |                    | 16.91 (14.52, 19.69)          |                    |                   |
| Quartile 3 (0.16–0.31 μT)                                 | 19.86 (17.29, 22.81)          |                    | 17.25 (14.75, 20.16)          |                    |                   |
| Quartile 4 (≥0.32 μT)                                     | 16.55 (14.42, 19.00)          |                    | 15.31 (13.12, 17.86)          |                    |                   |
| RCMS§ of personal magnetic field exposure during 24 hours |                               |                    |                               |                    |                   |
| Quartile 1 (<0.495)                                       | 17.66 (15.35, 20.31)          | 0.73               | 16.47 (14.17, 19.16)          | 0.66               | 0.94              |
| Quartile 2 (0.495–0.710)                                  | 19.33 (16.82, 22.22)          |                    | 17.57 (15.05, 20.51)          |                    |                   |
| Quartile 3 (0.711–0.934)                                  | 17.62 (15.32, 20.26)          |                    | 15.71 (13.47, 18.32)          |                    |                   |
| Quartile 4 (≥0.935)                                       | 18.85 (16.39, 21.68)          |                    | 17.10 (14.64, 19.98)          |                    |                   |
| RCMS of personal magnetic field exposure during sleep     |                               |                    |                               |                    |                   |
| Quartile 1 (<0.245)                                       | 18.05 (15.71, 20.74)          | 0.48               | 16.47 (14.06, 19.29)          | 0.29               | 0.35              |
| Quartile 2 (0.245–0.396)                                  | 19.25 (16.74, 22.13)          |                    | 17.32 (14.95, 20.08)          |                    |                   |
| Quartile 3 (0.397–0.517)                                  | 19.36 (16.85, 22.23)          |                    | 17.66 (15.18, 20.55)          |                    |                   |
| Quartile 4 (≥0.518)                                       | 16.88 (14.68, 19.41)          |                    | 14.95 (12.80, 17.48)          |                    |                   |
| Personal electric field exposure                          |                               |                    |                               |                    |                   |
| Quartile 1 (<4.69 V/m)                                    | 19.26 (16.81, 22.08)          | 0.73               | 16.94 (14.58, 19.67)          | 0.65               | 0.32              |
| Quartile 2 (4.69–7.37 V/m)                                | 17.51 (15.27, 20.09)          |                    | 16.44 (14.17, 19.08)          |                    |                   |
| Quartile 3 (7.38–12.24 V/m)                               | 18.32 (15.99, 20.98)          |                    | 16.81 (14.40, 19.62)          |                    |                   |
| Quartile 4 (≥12.25 V/m)                                   | 19.28 (16.82, 22.09)          |                    | 18.42 (15.73, 21.56)          |                    |                   |

\* Geometric mean of creatinine-adjusted 6-sulfatoxymelatonin urinary excretion adjusted by repeated analysis of variance for age, body mass index, alcohol consumption in the last 24 hours, medication use in the last 24 hours, light use at night, and education.

† 95% confidence interval in parentheses.

‡ *p* value for global mean comparison between exposure levels.

§ RCMS, standardized rate of change metric.

**TABLE 4. Evaluation of the modification effect of age, body mass index, and medication on the relation between electric and magnetic fields from power lines and mean creatinine-adjusted 6-sulfatoxymelatonin concentration, Quebec, Canada, 1998**

|                                      | Geometric mean <sup>*,†</sup> (ng/mg cr) |                                         |                                                  | <i>p</i> value <sup>‡</sup> |
|--------------------------------------|------------------------------------------|-----------------------------------------|--------------------------------------------------|-----------------------------|
|                                      | No.                                      | Living near a line<br>( <i>n</i> = 221) | Living far away from a line<br>( <i>n</i> = 195) |                             |
| Age (years)                          |                                          |                                         |                                                  |                             |
| 20–39                                | 130                                      | 21.63 (17.89, 26.14)                    | 18.40 (15.23, 22.22)                             | 0.03                        |
| 40–59                                | 234                                      | 16.42 (14.44, 18.68)                    | 16.34 (14.22, 18.79)                             |                             |
| 60–74                                | 52                                       | 11.06 (8.29, 14.75)                     | 17.16 (13.53, 21.77)                             |                             |
| Body mass index (kg/m <sup>2</sup> ) |                                          |                                         |                                                  |                             |
| <27                                  | 308                                      | 19.93 (17.55, 22.64)                    | 18.24 (16.08, 20.69)                             | 0.02                        |
| ≥27                                  | 106                                      | 12.81 (10.54, 15.57)                    | 16.56 (13.72, 19.99)                             |                             |
| Medication <sup>§</sup>              |                                          |                                         |                                                  |                             |
| Yes                                  | 90                                       | 14.89 (12.13, 18.28)                    | 14.81 (12.02, 18.25)                             | 0.96                        |
| No                                   | 326                                      | 18.70 (16.43, 21.30)                    | 18.75 (16.55, 21.25)                             |                             |

\* Geometric mean of creatinine-adjusted 6-sulfatoxymelatonin urinary excretion adjusted by repeated analysis of variance for age, body mass index, alcohol consumption in the last 24 hours, medication use in the last 24 hours, light use at night, and education.

† 95% confidence interval in parentheses.

‡ *p* value of interaction term between exposure and the stratification variables.

§ Use of beta blockers, calcium channel blockers, and anti-anxiety and nonsteroidal anti-inflammatory drugs in the last 24 hours.

and the group living more than 400 m from any power lines. Moreover, no statistically significant decrease was found with increasing exposure measured during a 24-hour period and two sleep periods. However, some subjects seemed particularly vulnerable to the effect of the magnetic field: those who were older or overweight. This effect was present when either proximity of the residence to the lines or personal exposure to the magnetic field was considered. In addition, the effect was independent of the other potential risk factors taken into account in this study, particularly medication use and light exposure at night. The modifying effect of age found to be significant only with the sleep measurements and that of BMI only with the 24-hour measurements might be explained by the fact that such measures are only proxies of long-term exposure and therefore are subject to exposure assessment errors.

In this study, factors commonly associated with decreased melatonin secretion had a significant effect. In particular, 6-OHMS concentration decreased with increasing age, BMI, and medication use. Aging regularly has been reported to be associated with low melatonin output (27–31), even if this finding has been challenged in healthy persons studied under laboratory conditions (32) and in a critical review of the literature (33). Some authors (32) have proposed that decreased melatonin output with age could be due to uncontrolled factors such as use of medication that reduces melatonin secretion in elders. The present study found that the age effect on melatonin was significant, even when controlled for medication and other factors. However, chronic magnetic field exposure modified that relation, since the reduction in concentration between those aged 20–39 years and those aged 60–74 years was more pronounced in the group living near the power lines (49 percent) than in the group living far away from them (7 percent).

The concentration of 6-OHMS was lower in overweight women. The influence of body weight on melatonin secretion or 6-OHMS excretion has been reported previously (26, 34) but without a clear explanation. In the present study, this decrease was more pronounced in women living near the lines (36 percent) than in those living away from the lines (9 percent).

The effect of medication use (namely, beta blockers, calcium channel blockers, and anti-anxiety and nonsteroidal anti-inflammatory drugs) was clear and consistent with previous reports (18, 35). However, contrary to the results of the only other known epidemiologic study on the effects of residential exposure to magnetic fields (18), we found no interaction with EMF exposure. This finding might be explained by the nature or dosages of the medication, which might have differed between the two studies, or other subject characteristics, such as health condition, that may modify the effect of the interaction between EMF and medications. It is also possible that the Kaune et al. (18) results were observed by chance.

The association of low educational levels with reduced 6-OHMS excretion was unexpected and is possibly due to the influence of some lifestyle characteristics associated with melatonin secretion that were not evaluated in our study. Alcohol consumption, smoking, and coffee intake were controlled in this study and cannot explain this finding. It has been reported that women with less than 14 years of education have more sleep disturbances than women with higher educational levels (36), and chronic insomnia has been associated with decreased nocturnal melatonin levels (37). Therefore, it is possible that sleep disorder was an intermediate factor between educational level and 6-OHMS concentration. In any case, whichever unknown factors linked education and melatonin secretion,

**TABLE 5. Evaluation of the modification effect of age, body mass index, medication, standardized rate of change metric, and electric fields on the relation between mean personal magnetic field exposure, during 24 hours and during sleep, and mean creatinine-adjusted 6-sulfatoxymelatonin concentration, Quebec, Canada, 1998**

| Magnetic field exposure              | Quartile 1 |                              | Quartile 2 |                              | Quartile 3 |                              | Quartile 4 |                              | <i>p</i> value‡ |
|--------------------------------------|------------|------------------------------|------------|------------------------------|------------|------------------------------|------------|------------------------------|-----------------|
|                                      | No.        | Geometric mean*,† (ng/mg cr) | No.        | Geometric mean*,† (ng/mg cr) | No.        | Geometric mean*,† (ng/mg cr) | No.        | Geometric mean*,† (ng/mg cr) |                 |
| <i>During 24 hours</i>               |            |                              |            |                              |            |                              |            |                              |                 |
| Age (years)                          |            |                              |            |                              |            |                              |            |                              |                 |
| 20–39                                | 32         | 23.43 (18.17, 30.22)         | 36         | 18.02 (14.30, 22.70)         | 33         | 20.90 (16.32, 26.76)         | 25         | 18.10 (13.73, 23.86)         | 0.09            |
| 40–59                                | 59         | 15.48 (12.95, 18.51)         | 53         | 16.21 (13.49, 19.47)         | 58         | 17.23 (14.31, 20.75)         | 60         | 16.21 (13.60, 19.31)         |                 |
| 60–74                                | 10         | 17.12 (11.33, 25.87)         | 14         | 16.30 (11.55, 23.02)         | 11         | 18.30 (12.27, 27.30)         | 15         | 8.96 (6.39, 12.56)           |                 |
| Body mass index (kg/m <sup>2</sup> ) |            |                              |            |                              |            |                              |            |                              |                 |
| <27                                  | 77         | 19.77 (16.76, 23.32)         | 68         | 18.53 (15.63, 21.97)         | 85         | 19.61 (16.75, 22.97)         | 72         | 19.23 (16.24, 22.75)         | 0.03            |
| ≥27                                  | 23         | 15.79 (11.96, 20.84)         | 34         | 14.82 (11.79, 18.63)         | 17         | 20.65 (14.93, 28.56)         | 29         | 10.45 (8.15, 13.39)          |                 |
| Medication§                          |            |                              |            |                              |            |                              |            |                              |                 |
| Yes                                  | 14         | 11.46 (8.01, 16.40)          | 27         | 14.58 (11.27, 18.86)         | 23         | 17.28 (13.03, 22.90)         | 23         | 14.65 (11.08, 19.38)         | 0.27            |
| No                                   | 87         | 20.37 (17.41, 23.84)         | 76         | 18.39 (15.60, 21.67)         | 79         | 19.77 (16.62, 23.52)         | 78         | 16.64 (14.13, 19.61)         |                 |
| RCMS¶                                |            |                              |            |                              |            |                              |            |                              |                 |
| <Median                              | 20         | 18.31 (12.52, 26.76)         | 42         | 17.97 (14.29, 22.59)         | 61         | 19.02 (15.88, 22.78)         | 78         | 15.18 (12.90, 17.86)         | 0.94            |
| ≥Median                              | 81         | 17.35 (14.72, 20.44)         | 60         | 15.65 (13.13, 18.65)         | 38         | 16.73 (12.89, 21.72)         | 22         | 14.91 (10.82, 20.54)         |                 |
| Electric field                       |            |                              |            |                              |            |                              |            |                              |                 |
| <Median                              | 64         | 18.69 (15.54, 22.48)         | 62         | 15.91 (13.36, 18.95)         | 41         | 17.74 (14.27, 22.05)         | 31         | 13.06 (10.20, 16.73)         | 0.27            |
| ≥Median                              | 36         | 16.41 (13.03, 20.66)         | 39         | 17.41 (13.93, 21.74)         | 57         | 19.13 (15.65, 23.38)         | 66         | 17.04 (14.24, 20.39)         |                 |
| <i>During sleep</i>                  |            |                              |            |                              |            |                              |            |                              |                 |
| Age (years)                          |            |                              |            |                              |            |                              |            |                              |                 |
| 20–39                                | 33         | 19.85 (15.55, 25.33)         | 31         | 19.13 (14.88, 24.60)         | 34         | 22.44 (17.64, 28.54)         | 29         | 18.54 (14.23, 24.15)         | 0.02            |
| 40–59                                | 53         | 15.69 (13.08, 18.81)         | 60         | 16.25 (13.63, 19.38)         | 57         | 16.39 (13.65, 19.69)         | 60         | 16.96 (14.19, 20.28)         |                 |
| 60–74                                | 16         | 17.10 (12.32, 23.73)         | 11         | 20.98 (14.24, 30.91)         | 10         | 14.75 (9.74, 22.33)          | 13         | 7.95 (5.57, 11.37)           |                 |
| Body mass index (kg/m <sup>2</sup> ) |            |                              |            |                              |            |                              |            |                              |                 |
| <27                                  | 71         | 18.13 (15.35, 21.41)         | 73         | 19.67 (16.58, 23.35)         | 83         | 20.33 (17.34, 23.84)         | 75         | 18.35 (15.47, 21.76)         | 0.38            |
| ≥27                                  | 31         | 16.55 (12.98, 21.10)         | 28         | 14.47 (11.22, 18.67)         | 17         | 13.77 (9.95, 19.04)          | 27         | 12.07 (9.31, 15.66)          |                 |
| Medication§                          |            |                              |            |                              |            |                              |            |                              |                 |
| Yes                                  | 19         | 14.36 (10.65, 19.36)         | 23         | 14.13 (10.62, 18.80)         | 24         | 17.27 (13.01, 22.92)         | 81         | 12.87 (9.60, 17.26)          | 0.70            |
| No                                   | 83         | 18.93 (16.18, 22.14)         | 79         | 19.50 (16.52, 23.02)         | 77         | 18.88 (15.91, 22.39)         | 21         | 17.59 (14.89, 20.79)         |                 |
| RCMS                                 |            |                              |            |                              |            |                              |            |                              |                 |
| <Median                              | 5          | 20.03 (11.21, 35.77)         | 39         | 17.56 (14.04, 21.95)         | 75         | 18.25 (15.35, 21.71)         | 82         | 15.31 (12.98, 18.06)         | 0.70            |
| ≥Median                              | 97         | 16.52 (14.19, 19.24)         | 63         | 16.61 (13.79, 19.99)         | 25         | 14.70 (11.11, 19.45)         | 17         | 15.97 (11.41, 22.36)         |                 |
| Electric field                       |            |                              |            |                              |            |                              |            |                              |                 |
| <Median                              | 66         | 16.84 (14.17, 20.01)         | 60         | 17.11 (14.22, 20.58)         | 38         | 18.24 (14.53, 22.89)         | 34         | 13.14 (10.37, 16.66)         | 0.31            |
| ≥Median                              | 34         | 16.66 (13.15, 21.10)         | 40         | 18.02 (14.41, 22.53)         | 63         | 17.18 (14.24, 20.73)         | 61         | 17.47 (14.48, 21.09)         |                 |

\* Geometric mean of creatinine-adjusted 6-sulfatoxymelatonin urinary excretion adjusted by repeated analysis of variance for age, body mass index, alcohol consumption in the last 24 hours, medication use in the last 24 hours, light use at night, and education.

† 95% confidence interval in parentheses.

‡ *p* value of interaction term between exposure and the stratification variables.

§ Use of beta blockers, calcium channel blockers, and anti-anxiety and nonsteroidal anti-inflammatory drugs in the last 24 hours.

¶ RCMS, standardized rate of change metric.



control for education in all analyses precluded their influence on our results.

Self-reported medical conditions were distributed similarly between the study groups, and few diseases possibly associated with decreased melatonin secretion were reported. Daylight length or light use at night were slightly different between the two groups, but these factors had no significant influence on 6-OHMS concentration in our subjects. Light exposure at night was probably too low and too short in duration (<10 minutes) to influence melatonin secretion (38, 39). The absence of the influence of daylight length has been reported before and could be due to use of artificial light sources during dark periods in the evening or morning (40). We also found that the 6-OHMS concentration was higher in participants who reported alcohol consumption in the 24 hours prior to urine collection. It has been reported that ethanol can reduce plasma melatonin secretion (25, 41, 42); on the other hand, alcohol consumption can induce hepatic enzymes and thus increase melatonin metabolism and excretion.

Participation in the present study was moderate (45 percent), and it was lower in the control group than in the group living near the power lines. This differential participation rate could have influenced our results if characteristics related to participation affected 6-OHMS excretion. Few data were available on characteristics of nonrespondents. Time of residence was similar for participants and nonparticipants. Older subjects were less inclined to participate but participated at the same rate with regard to proximity of the lines (data not shown). Most of the factors recognized as potentially associated with melatonin secretion, including age, were evaluated and integrated, when necessary, in the analyses. Therefore, we have no indication that the differential participation rate affected the validity of our results. We did not take into account our participants' menstrual cycle phase during data collection. Variation in melatonin secretion with the menstrual cycle is still a controversial issue, and many controlled laboratory studies have failed to find such an association (43–46). In addition, all different phases of the menstrual cycle were probably represented randomly in our two groups of subjects. Therefore, this variable probably did not significantly influence the results.

In conclusion, we found no overall effect of EMF on urinary excretion of 6-OHMS. However, higher mean magnetic field exposures increase the effect of certain factors that previously have been associated with reduced melatonin secretion, namely, higher age and excessive body weight. Decreased nocturnal 6-OHMS concentration could be due either to a displacement of the secretion peak or a reduction in overall melatonin secretion. Our protocol could not distinguish these two potential effects. Research into the action of melatonin on human health is still in an early stage; however, because of the many potential effects of this hormone, particularly with regard to aging and carcinogenicity, these findings, if confirmed, may help to explain the possible health effects of EMF.

## ACKNOWLEDGMENTS

Hydro-Québec and Électricité de France funded this study.

The authors are indebted to Webb Sprague of the California Department of Health Services for reviewing and editing this paper.

## REFERENCES

- Portier CJ, Wolfe MS, eds. Assessment of health effects from exposure to power-line frequency electric and magnetic fields: working group report. Research Triangle Park, NC: National Institute of Environmental Health Sciences of the National Institutes of Health, 1998. (NIH publication 98-3981).
- Wartenberg D. Residential magnetic fields and childhood leukemia: a meta-analysis. *Am J Public Health* 1998;88:1787–94.
- Stevens RG. Breast cancer and electric power. *Biomed Pharmacother* 1993;47:435–8.
- Brainard GC, Kavet R, Kheifets LI. The relationship between electromagnetic field and light exposures to melatonin and breast cancer risk: a review of relevant literature. *J Pineal Res* 1999;26:65–100.
- Sobel E, Dunn M, Davanipour Z, et al. Elevated risk of Alzheimer's disease among workers with likely electromagnetic field exposure. *Neurology* 1996;47:1477–81.
- Verkasalo PK, Kaprio J, Varjonen K, et al. Magnetic fields of transmission lines and depression. *Am J Epidemiol* 1997;146:1037–45.
- Hatch M. The epidemiology of electric and magnetic field exposure in the power frequency range and reproductive outcomes. *Paediatr Perinat Epidemiol* 1992;6:198–214.
- Reiter RJ. Electromagnetic fields and melatonin production. *Biomed Pharmacother* 1993;47:439–44.
- Brzezinski A. Melatonin in humans. *N Engl J Med* 1997;336:186–95.
- Poeggeler B, Reiter RJ, Tan DX, et al. Melatonin, hydroxyl radical-mediated oxidative damage, and aging: a hypothesis. *J Pineal Res* 1993;14:151–68.
- Blask DE. Systemic, cellular, and molecular aspects of melatonin action on experimental breast carcinogenesis. In: Stevens RG, Wilson BW, Anderson LE, eds. *The melatonin hypothesis: breast cancer and use of electric power*. Columbus, OH: Battelle Press, 1997:189–230.
- Reiter RJ. Melatonin and human reproduction. *Ann Med* 1998;30:103–8.
- Akerstedt T, Arnetz B, Ficca G, et al. A 50-Hz electromagnetic field impairs sleep. *J Sleep Res* 1999;8:77–81.
- Graham C, Cook MR, Riffle DW. Human melatonin during continuous magnetic field exposure. *Bioelectromagnetics* 1997;18:166–71.
- Selmaoui B, Lambrozo J, Touitou Y. Magnetic fields and pineal function in humans: evaluation of nocturnal acute exposure to extremely low frequency magnetic fields on serum melatonin and urinary 6-sulfatoxymelatonin circadian rhythms. *Life Sci* 1996;58:1539–49.
- Pfluger DH, Minder CE. Effects of exposure to 16.7 Hz magnetic fields on urinary 6-hydroxymelatonin sulfate excretion of Swiss railway workers. *J Pineal Res* 1996;21:91–100.
- Burch JB, Reif JS, Yost MG, et al. Nocturnal excretion of urinary melatonin metabolite among electric utility workers. *Scand J Work Environ Health* 1998;24:183–9.
- Davis S, Kaune WT, Mirick DK, et al. Residential magnetic fields, light-at-night, and nocturnal urinary 6-sulfatoxymelatonin in women. *Am J Epidemiol* 2001;154:591–600.
- Levallois P, Gauvin D, St-Laurent J, et al. Electric and magnetic field exposures for people living near a 735-kilovolt



- power line. *Environ Health Perspect* 1995;103:832-7.
20. Arendt J, Bojkowski C, Franey C, et al. Immunoassay of 6-hydroxymelatonin sulfate in human plasma and urine: abolition of the urinary 24-hour rhythm with atenolol. *J Clin Endocrinol Metab* 1985;60:1166-73.
  21. Kavet R, Silva JK, Thornton D. Magnetic field exposure assessment for adult residents of Maine who live near and far away from overhead transmission lines. *Bioelectromagnetics* 1992;1:35-55.
  22. Kaune WT. Assessing human exposure to power-frequency electric and magnetic fields. *Environ Health Perspect* 1993;101:121-33.
  23. Graham C, Cook MR, Kavet R, et al. Prediction of nocturnal plasma melatonin from morning urinary measures. *J Pineal Res* 1998;24:230-8.
  24. Cook MR, Graham C, Kavet R, et al. Morning urinary assessment of nocturnal melatonin secretion in older women. *J Pineal Res* 2000;28:41-7.
  25. Touitou Y, Fevre-Montagne M, Proust J, et al. Age and sex associated modification of plasma melatonin concentrations in man: relationship to pathology, malignant or not, and autopsy findings. *Acta Endocrinol* 1985;108:135-44.
  26. Wetterberg L, Bratlid T, von Knorring L, et al. A multinational study of the relationships between nighttime urinary melatonin production, age, gender, body size, and latitude. *Eur Arch Psychiatry Clin Neurosci* 1999;249:256-62.
  27. Touitou Y, Fevre M, Lagoguey M, et al. Age- and mental health-related circadian rhythms of plasma levels of melatonin, prolactin, luteinizing hormone and follicle stimulating hormone in man. *J Endocrinol* 1981;91:467-75.
  28. Iguchi H, Kato KI, Ibayashi H. Age-dependent reduction in serum melatonin concentrations in healthy human subjects. *J Clin Endocrinol Metab* 1982;55:25-59.
  29. Sack RL, Lewy AJ, Erb DI, et al. Human melatonin production decreases with age. *J Pineal Res* 1986;3:379-88.
  30. Waldhauser F, Weissenbacher G, Tatzler E, et al. Alterations in nocturnal serum melatonin levels in humans with growth and aging. *J Clin Endocrinol Metab* 1988;66:648-52.
  31. Wetterberg L, Bergiannaki JD, Paparrigopoulos TJ, et al. Normative melatonin excretion: a multinational study. *Psychoneuroendocrinology* 1999;24:209-26.
  32. Zeitzer JM, Daniels JE, Duffy JF, et al. Do plasma melatonin concentrations decline with age? *Am J Med* 1999;107:432-6.
  33. Kennaway DJ, Lushington K, Dawson D, et al. Urinary 6-sulfatoxymelatonin excretion and ageing: new results and a critical review of the literature. *J Pineal Res* 1999;27:210-30.
  34. Arendt J, Hampton S, English P, et al. 24-hour profiles of melatonin, cortisol, insulin, C-peptide and GIP following a meal and subsequent fasting. *Clin Endocrinol* 1982;16:89-95.
  35. Demisch L, Reiter RJ, Yu HS. Clinical pharmacology of melatonin regulation. In: Yu HS, Reiter RJ, eds. *Melatonin: biosynthesis, physiological effects, and clinical applications*. Boca Raton, FL: CRC Press, 1993:513-40.
  36. Karacan I, Thornby JI, Williams RL. Sleep disturbances: a community survey. In: Guilleminault C, Lugaresi E, eds. *Sleep/wake disorders: natural history, epidemiology, and long-term evolution*. New York, NY: Raven Press, 1983:37-60.
  37. Hajak G, Rodenbeck A, Staedt J, et al. Nocturnal plasma melatonin levels in patients suffering from chronic primary insomnia. *J Pineal Res* 1995;19:116-22.
  38. Trinder J, Armstrong SM, O'Brien C, et al. Inhibition of melatonin secretion onset by low levels of illumination. *J Sleep Res* 1996;5:77-82.
  39. McIntyre IM, Norman TR, Burrows GD, et al. Quantal melatonin suppression by exposure to low intensity light in man. *Life Sci* 1989;45:327-32.
  40. Wehr TA. Melatonin and seasonal rhythms. *J Biol Rhythms* 1997;12:518-27.
  41. Ekman AC, Leppaluoto J, Huttunen P, et al. Ethanol inhibits melatonin secretion in healthy volunteers in a dose-dependent randomized double blind cross-over study. *J Clin Endocrinol Metab* 1993;77:780-3.
  42. Röjdmärk S, Wikner J, Adner N, et al. Inhibition of melatonin secretion by ethanol in man. *Metabolism* 1993;42:1047-51.
  43. Brzezinski A, Lynch HJ, Seibel MM, et al. The circadian rhythm of plasma melatonin during the normal menstrual cycle and in amenorrhic women. *J Clin Endocrinol Metab* 1988;66:891-5.
  44. Hamilton JA, Allagna Gallent S, Pinkel S. Urinary 6-hydroxymelatonin in menstruating women. *Biol Psychiatry* 1988;24:845-52.
  45. Parry BL, Berga SL, Mostofi N, et al. Plasma melatonin circadian rhythms during the menstrual cycle and after light therapy in premenstrual dysphoric disorder and normal control subjects. *J Biol Rhythms* 1997;12:47-64.
  46. Berga SL, Yen SS. Circadian pattern of plasma melatonin concentrations during four phases of the human menstrual cycle. *Neuroendocrinology* 1990;51:606-12.
